# Supplementary material for: Antibody-biotemplated HgS nanoparticles: Extremely sensitive labels for atomic fluorescence spectrometric immunoassay
Source: Royal Society of Chemistry journal article supplement (doi:10.1039/c2an16014e), 2012-01-01
Supplement: c2an16014e.pdf [file c2an16014e.pdf]

# Electronic Supplementary Information

## Antibody–biotemplated HgS Nanoparticles: Extremely Sensitive Labels for Atomic Fluorescence Spectrometric Immunoassay

Xing Liu,<sup>a</sup> Rui Liu,<sup>a</sup> Yurong Tang,<sup>a</sup> Lichun Zhang,<sup>a</sup> Xiandeng Hou,<sup>a,b</sup> and Yi Lv<sup>a\*</sup>

<sup>a</sup>College of Chemistry and <sup>b</sup>Analytical and Testing Center, Sichuan University, Chengdu, Sichuan 610064, P. R. China

Corresponding author: E-mail: [lvvy@scu.edu.cn](mailto:lvvy@scu.edu.cn) (Y Lv). Tel./Fax: +86–28–8541–2798.

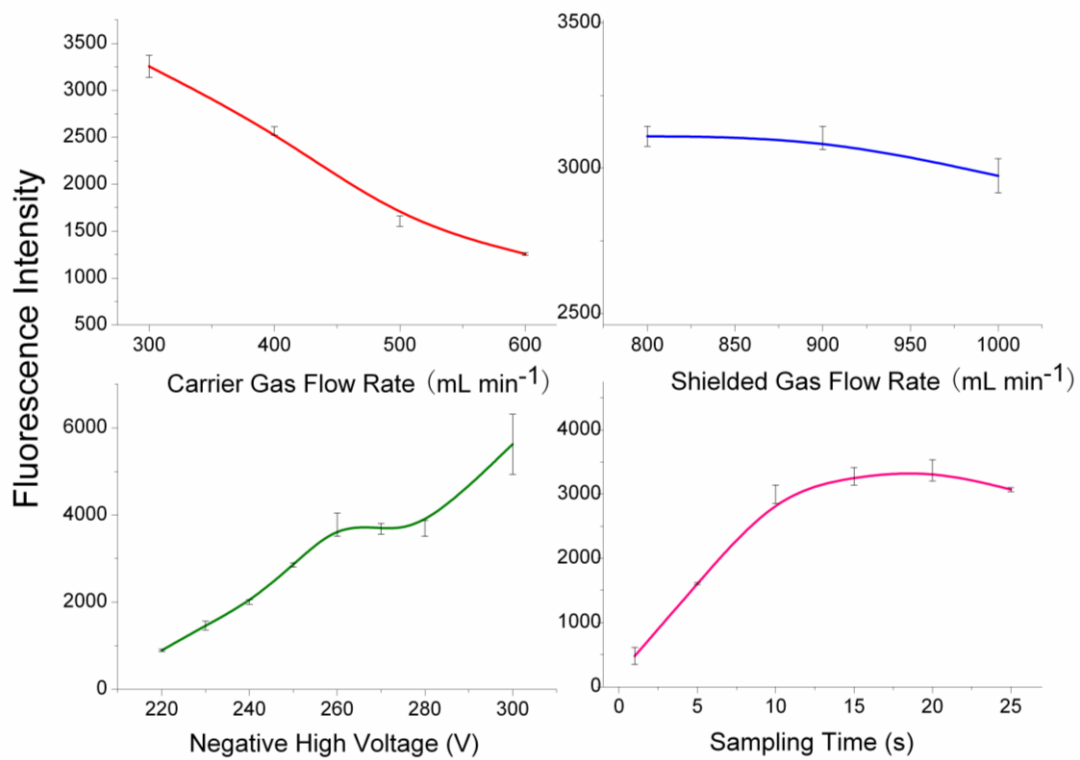

**Fig. S1** The effect of carrier gas flow rate (a), shielded gas flow rate (b), negative high voltage (c), and sampling time (d) on the fluorescence signal, with 5 ng mL<sup>-1</sup> Hg<sup>2+</sup> solution.

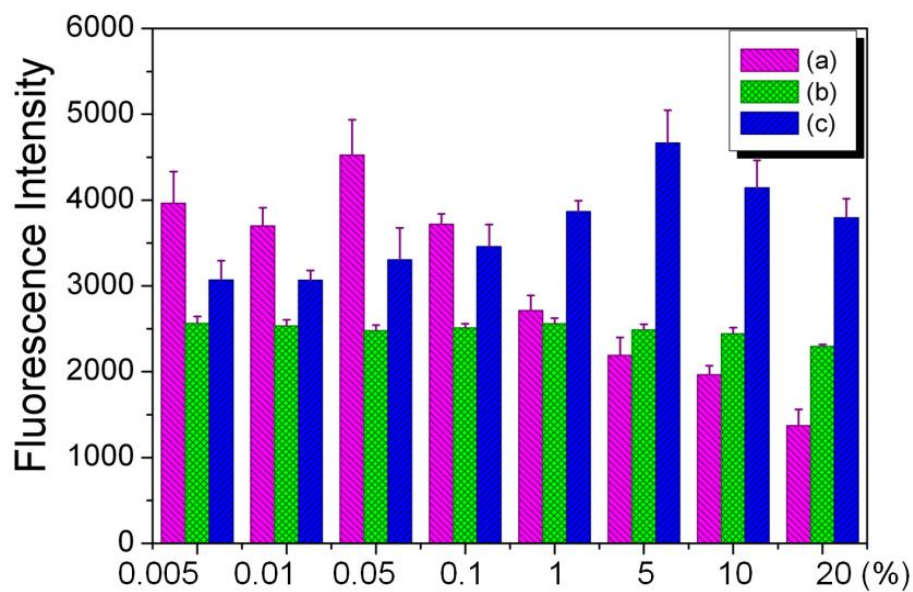

**Fig. S2** (a) The effect of potassium borohydride concentration on the fluorescence signal, with  $5 \text{ ng mL}^{-1} \text{ Hg}^{2+}$  solution; (b) the effect of potassium hydroxide concentration on the fluorescence signal, with  $5 \text{ ng mL}^{-1} \text{ Hg}^{2+}$  solution; and (c) the effect of hydrochloric acid concentration on the fluorescence signal, with  $5 \text{ ng mL}^{-1} \text{ Hg}^{2+}$  solution.

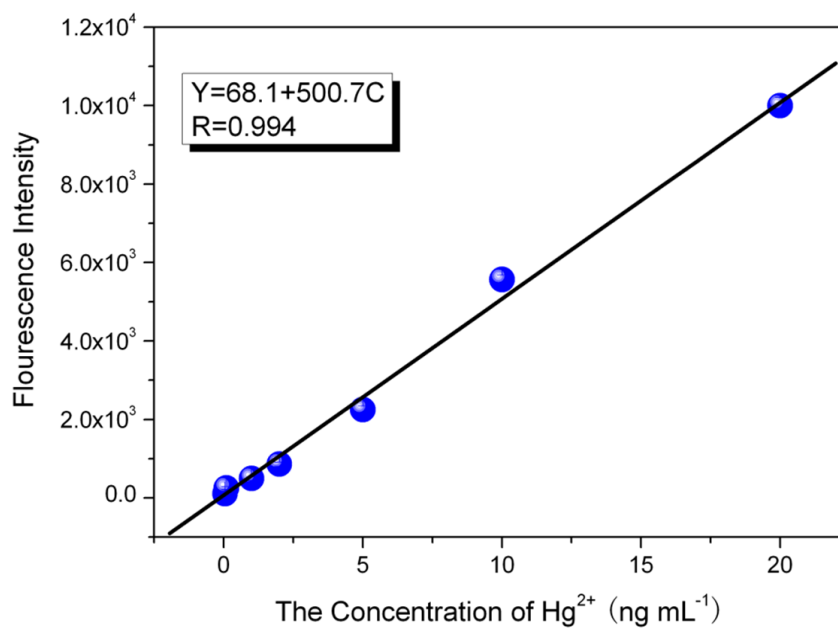

**Fig. S3** Calibration curve of mercury standard solution by CVG-AFS. The concentrations of HgCl<sub>2</sub> were 0.05, 0.1, 1, 2, 5, 10, and 20 ng mL<sup>-1</sup>, respectively.
